# Supplementary material
Source: Springer Nature journal article supplement (https://www.springermedizin.de/resource/supplementary/12889_2014_7451_MOESM3_ESM.pdf/9497426)

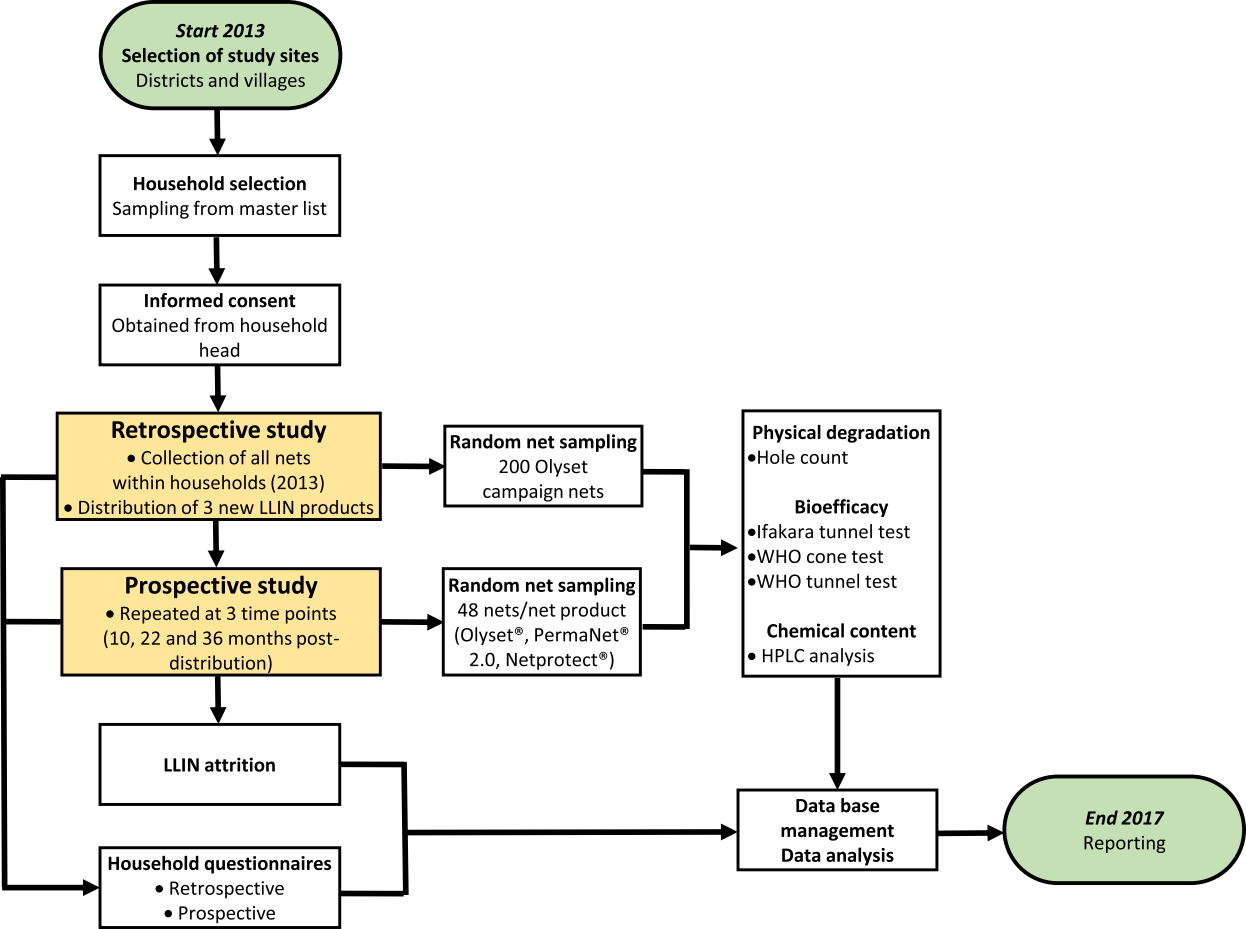

Supplement: MOESM3 [file 9497426]
